# Supplementary material for: Modeling the Influence of Chain Length on SOA Formation via Multiphase Reactions of Alkanes
Source: Copernicus journal article supplement (doi:10.5194/egusphere-2022-681), 2022-08-18
Supplement: Supplementary file 1 [file egusphere-2022-681-supplement.pdf]

## Supplementary material

# Modeling the Influence of Chain Length on SOA Formation via Multiphase Reactions of Alkanes

*Azad Madhu, Myoseon Jang\*, and David Deacon*

Department of Environmental Engineering Sciences, University of Florida, Gainesville, FL,  
USA.

KEYWORDS: Secondary organic aerosol, SOA model, Alkane SOA, Autoxidation,  
Photooxidation

Correspondence to: Myoseon Jang ([mjang@ufl.edu](mailto:mjang@ufl.edu))

This file includes:

5 Tables

6 Figures

References

## Section S1. Autoxidation mechanism example

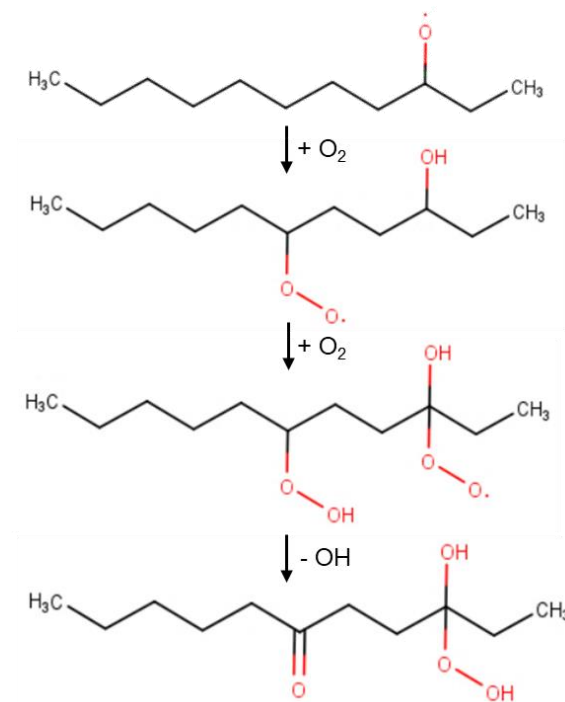

**Figure S1.** Example of an autoxidation reaction pathway

## Section S2. Precursor wall loss rate constants

**Table S1.** Calculated wall loss rate constants for 4 different linear alkane precursors in the UF-APHOR chamber. A nighttime experiment was used to measure precursor wall loss to the chamber wall in the absence of photochemical oxidation. The measured data was corrected for gas dilution before wall loss rate constants were calculated. The error associated with the precursor loss rate to the wall is 2%.

| Linear Alkane | Precursor loss rate constant to the wall ( $s^{-1}$ ) |
|---------------|-------------------------------------------------------|
| C11           | 1.67D-06                                              |
| C12           | 1.68D-06                                              |
| C13           | 2.62D-06                                              |
| C15           | 9.68D-06                                              |

### Section S3. Prediction of product distribution using IVC

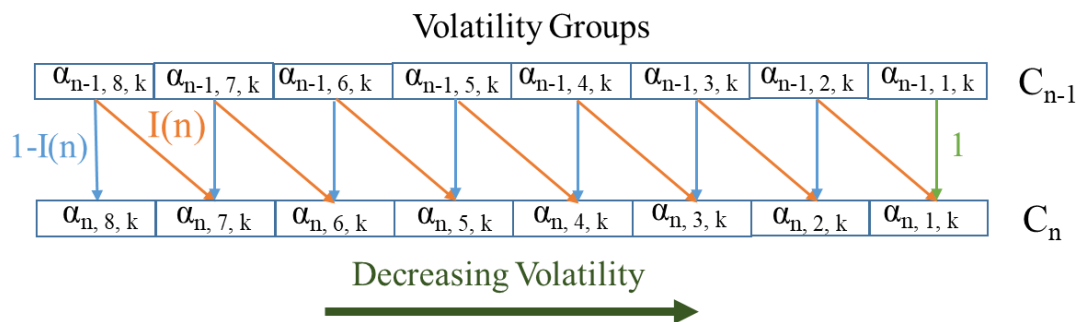

**Figure S2.** Construction of the product distribution of a linear alkane  $C_n$  from the product distribution of linear alkane  $C_{n-1}$  using the incremental volatility approach. This figure illustrates the process at a given reactivity level. This process must be performed for each reactivity level to construct the full product distribution array of alkane  $C_n$ .  $I(n)$ , the IVC, represents the portion of each  $\alpha$  value from  $C_{n-1}$  that will be transferred to a lower volatility group in the product distribution for  $C_n$ .  $1-I(n)$  represents the portion of each  $\alpha$  value from  $C_{n-1}$  that will remain in the same volatility group in the product distribution for  $C_n$ . For the lowest volatility group, there can be no transfer to a lower volatility group so  $1-I(n) = 1$ .

#### Section S4. Parameters for the calculation of organic vapor wall loss

The mean thermal speed of the gas molecules ( $\bar{v}_i$ ), and accommodation coefficient of  $i$  to the wall ( $\alpha_{w,i}$ ) are calculated as follows:

$$\bar{v}_i = \sqrt{\frac{8Tk}{\frac{0.00314MW_i}{N_A}}} \quad (S1)$$

$$\alpha_{w,i} = e^{-0.33H_{d,i}-3H_{a,i}-0.051\alpha_i-0.61S_i-9.69} \quad (S2)$$

where  $H_{d,i}$ ,  $H_{a,i}$ ,  $S_i$ , and  $\alpha_i$  represent hydrogen bond acidity, hydrogen bond basicity, dipolarity/polarizability, and polarizability of each lumping group  $i$ , respectively (Abraham et al., 1991; Abraham and McGowan, 1987; Leahy et al., 1992; Platts et al., 1999; Puzyn et al., 2010).  $k$  and  $N_A$  represent the Boltzmann constant and Avagadro's number, respectively.

**Table S2.** Parameters for the calculation of organic vapor wall loss for each lumping group

| Lumping Group <sup>a</sup> | $H_{d,i}$ | $H_{a,i}$ | $S_i$ | $\alpha_i$ |
|----------------------------|-----------|-----------|-------|------------|
| 1MA                        | 0.949     | 1.003     | 1.039 | 10.932     |
| 2MA                        | 0.949     | 1.003     | 1.039 | 10.932     |
| 3MA                        | 0.949     | 1.003     | 1.039 | 10.932     |
| 4MA                        | 0.949     | 1.021     | 1.000 | 15.305     |
| 5MA                        | 0.949     | 1.003     | 1.039 | 10.932     |
| 6MA                        | 0.949     | 1.003     | 1.039 | 10.932     |
| 7MA                        | 0.949     | 1.003     | 1.039 | 10.932     |
| 8MA                        | 0.949     | 1.003     | 1.039 | 10.932     |
| 1P                         | 0.521     | 1.581     | 1.518 | 31.647     |
| 2P                         | 0.150     | 1.409     | 1.478 | 18.383     |
| 3P                         | 0.340     | 1.004     | 1.149 | 18.919     |
| 4P                         | 0.229     | 0.907     | 1.091 | 20.611     |
| 5P                         | 0.250     | 0.831     | 0.991 | 15.295     |
| 6P                         | 0.312     | 0.703     | 0.870 | 14.529     |
| 7P                         | 0.232     | 0.656     | 0.776 | 13.627     |
| 8P                         | 0.155     | 0.521     | 0.724 | 10.255     |
| 1S                         | -0.285    | 1.969     | 2.057 | 28.220     |
| 2S                         | -0.004    | 1.526     | 1.762 | 21.237     |
| 3S                         | 0.084     | 1.304     | 1.516 | 21.253     |
| 4S                         | 0.135     | 1.099     | 1.303 | 18.439     |
| 5S                         | 0.077     | 1.049     | 1.294 | 17.605     |
| 6S                         | 0.080     | 0.901     | 1.196 | 14.697     |

|     |        |       |       |        |
|-----|--------|-------|-------|--------|
| 7S  | -0.046 | 0.814 | 1.119 | 14.987 |
| 8S  | 0.058  | 0.707 | 0.931 | 12.848 |
| 1M  | 0.380  | 1.362 | 1.381 | 10.000 |
| 2M  | 0.332  | 1.266 | 1.323 | 10.000 |
| 3M  | 0.284  | 1.170 | 1.264 | 10.000 |
| 4M  | 0.532  | 0.973 | 1.132 | 9.704  |
| 5M  | 0.187  | 1.180 | 1.293 | 11.890 |
| 6M  | 0.141  | 0.777 | 0.999 | 16.195 |
| 7M  | 0.091  | 0.788 | 1.056 | 10.753 |
| 8M  | 0.043  | 0.689 | 0.956 | 10.013 |
| 1F  | -0.253 | 1.501 | 1.747 | 16.168 |
| 2F  | -0.253 | 1.409 | 1.677 | 15.062 |
| 3F  | -0.253 | 1.317 | 1.607 | 13.955 |
| 4F  | -0.253 | 1.225 | 1.537 | 12.848 |
| 5F  | -0.253 | 1.075 | 1.376 | 12.848 |
| 6F  | -0.253 | 1.057 | 1.415 | 8.475  |
| 7F  | 0.003  | 1.091 | 1.564 | 10.526 |
| 8F  | 0.003  | 0.757 | 1.093 | 8.475  |
| 1VF | 0.003  | 1.195 | 1.734 | 30.257 |
| 2VF | 0.003  | 1.175 | 1.692 | 27.004 |
| 3VF | 0.003  | 1.154 | 1.651 | 23.750 |
| 4VF | 0.003  | 1.133 | 1.609 | 20.497 |
| 5VF | 0.003  | 1.091 | 1.564 | 18.179 |
| 6VF | -0.101 | 1.065 | 1.497 | 13.020 |
| 7VF | 0.003  | 1.193 | 1.552 | 9.865  |
| 8VF | 0.003  | 0.980 | 1.407 | 8.385  |

<sup>a</sup>MA=Multi-Alcohol, P = Partitioning only, S = Slow, M= Medium, F = Fast, VF = Very Fast. Lumping groups in red did not contain any compounds and values were extrapolated from adjacent lumping groups within the same reactivity scale.

### Section S5. Reference condition for sensitivity and uncertainty

The sunlight intensity illustrated in Fig. S2 was measured on 01/20/20 in the UF-APHOR and is applied as a reference sunlight intensity for the sensitivity and uncertainty tests.

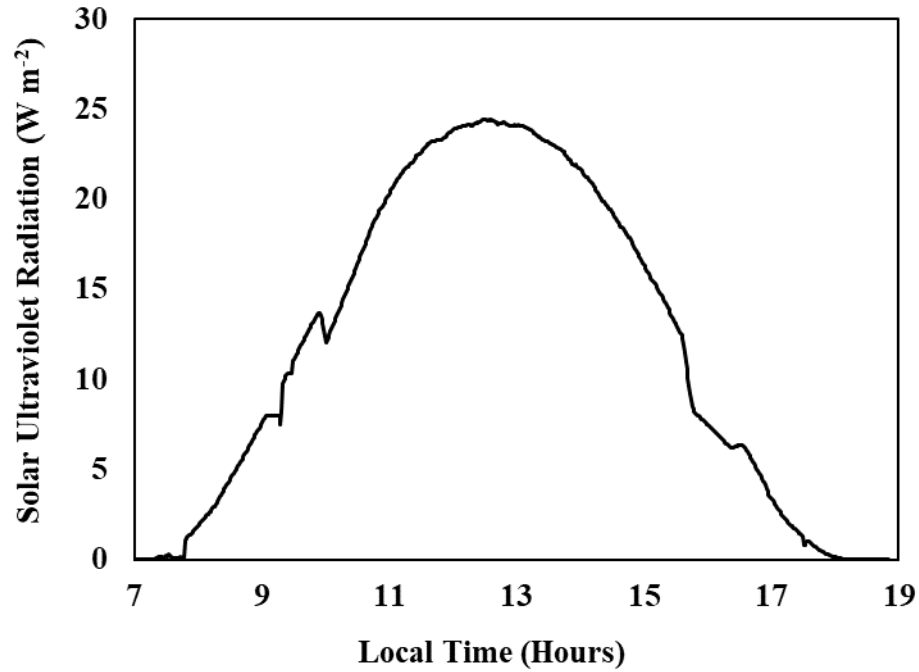

**Figure S3.** Local time profile of reference sunlight radiance measured by using Total Ultra-Violet Radiation (TUV) in the UF-APHOR on 01/20/20.

## Section S6. Reactions added to the CB6 Ozone gas mechanism

**Table S3.** Rate constants added to the CB6 ozone model for the reactions of several linear alkanes with OH. When available, rate constants were taken from the Master Chemical Mechanism (MCMv3.3.1) (Jenkin et al., 2012). Otherwise, rate constants were calculated using the structure-reactivity relationship (Kwok and Atkinson, 1995).

| Linear Alkane | Reaction rate constant with OH<br>(cm <sup>3</sup> molecule <sup>-1</sup> s <sup>-1</sup> ) | Source |
|---------------|---------------------------------------------------------------------------------------------|--------|
| C9            | 2.51D-17*TEMP**2*EXP(447/TEMP)                                                              | MCM    |
| C10           | 3.13D-17*TEMP**2*EXP(416/TEMP)                                                              | MCM    |
| C11           | 1.29D-11                                                                                    | MCM    |
| C12           | 1.39D-11                                                                                    | MCM    |
| C13           | 1.6235D-11                                                                                  | SRR    |
| C14           | 1.6763D-11                                                                                  | SRR    |
| C15           | 1.8176D-11                                                                                  | SRR    |
| C16           | 1.9589D-11                                                                                  | SRR    |
| C17           | 2.1002D-11                                                                                  | SRR    |
| C18           | 2.2415D-11                                                                                  | SRR    |
| C19           | 2.3828D-11                                                                                  | SRR    |
| C20           | 2.5241D-11                                                                                  | SRR    |
| C21           | 2.6652D-11                                                                                  | SRR    |
| C22           | 2.8067D-11                                                                                  | SRR    |
| C23           | 2.9480D-11                                                                                  | SRR    |
| C24           | 3.0893D-11                                                                                  | SRR    |

For chamber simulations of alkanes larger than C12 and all sensitivity and uncertainty tests, the CB6 ozone model(Cite) was used to predict precursor HC consumption, as well as concentrations of RO2 and HO2. Because CB6 is a non-explicit model, explicit reactions for several alkanes (C10, C12, C13, C15, C16, C18, C20) with hydroxyl radicals were added to predict HC consumption. For C10, and C12, available rate constants from the Master Chemical Mechanism (MCMv3.3.1) were used (Jenkin et al., 2012). For the other linear alkanes, the rate constants for each alkane with hydroxyl radicals were calculated using structure-reactivity relationship (SRR) (Kwok and Atkinson, 1995).

**Section S7. Contributions of major autoxidation compounds to SOA mass**

**Table S4.** Contributions of major autoxidation compounds to SOA mass of 4 different simulations

| SOA systems                               | Compound(s)                   | % contribution to SOA Mass |
|-------------------------------------------|-------------------------------|----------------------------|
| C10A<br>HC ppbC/NO <sub>x</sub> ppb= 6.4  | C103OH6OOH3NO3                | 61.5                       |
|                                           | C105OH23CO5OOH                | 3.7                        |
|                                           | C103OH6CO3OOH                 | 20.9                       |
|                                           | Total Autoxidation Products   | 97.5                       |
|                                           | Total OM (µg/m <sup>3</sup> ) | 352                        |
| C10B<br>HC ppbC/NO <sub>x</sub> ppb=2     | C103OH6OOH3NO3                | 57.8                       |
|                                           | C105OH23CO5OOH                | 5.8                        |
|                                           | C103OH6CO3OOH                 | 5.3                        |
|                                           | Total Autoxidation Products   | 88.7                       |
|                                           | Total OM (µg/m <sup>3</sup> ) | 208                        |
| C11B<br>HC ppbC/NO <sub>x</sub> ppb= 22.4 | C113OH6OOH3NO3                | 67.9                       |
|                                           | C1123CO5OH5OOH                | 6.0                        |
|                                           | C113OH6CO3OOH                 | 18.9                       |
|                                           | Total Autoxidation Products   | 92.8                       |
|                                           | Total OM (µg/m <sup>3</sup> ) | 193                        |
| C11C<br>HC ppbC/NO <sub>x</sub> ppb= 4    | C113OH6OOH3NO3                | 16.0                       |
|                                           | C1123CO5OH5OOH                | 1.1                        |
|                                           | C113OH6CO3OOH                 | 46.0                       |
|                                           | Total Autoxidation Products   | 63.0                       |
|                                           | Total OM (µg/m <sup>3</sup> ) | 135                        |
| C12B<br>HC ppbC/NO <sub>x</sub> ppb=2.3   | C123OH6OOH3NO3                | 41.1                       |
|                                           | C123OH6CO3OOH                 | 7.8                        |
|                                           | C104OOHCO2H                   | 23.7                       |
|                                           | Total Autoxidation Products   | 73.7                       |
|                                           | Total OM (µg/m <sup>3</sup> ) | 34                         |



|                                         |                               |      |
|-----------------------------------------|-------------------------------|------|
| C12C<br>HC ppbC/NO <sub>x</sub> ppb=4.9 | C123OH6OOH3NO3                | 31.6 |
|                                         | C123OH6CO3OOH                 | 16.5 |
|                                         | C104OOHCO2H                   | 19.3 |
|                                         | Total Autoxidation Products   | 73.2 |
|                                         | Total OM (µg/m <sup>3</sup> ) | 134  |

**Section S8. Sensitivity of alkane SOA to  $OM_0$  and acidity**

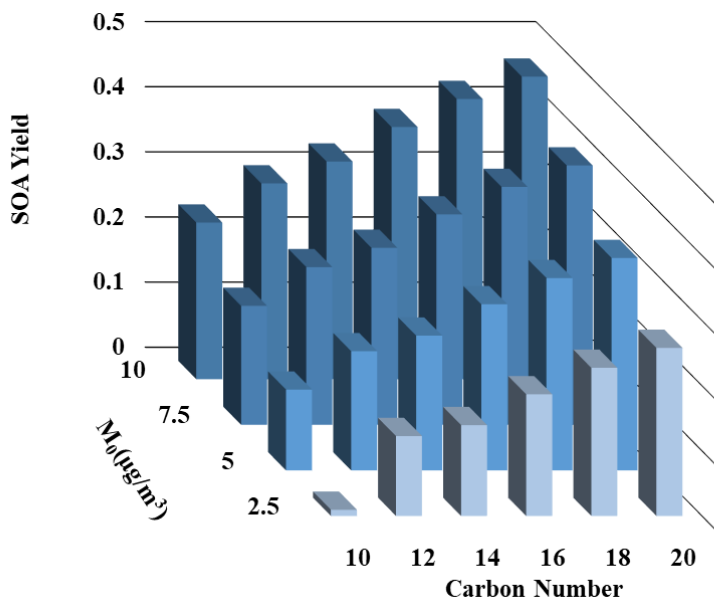

**Figure S4.** Simulated SOA yields for a series of linear alkanes with different values for  $OM_0$  using the IVC-based product distributions. VOC ppbC / $NO_x$  ppb = 3, and RH = 30%.

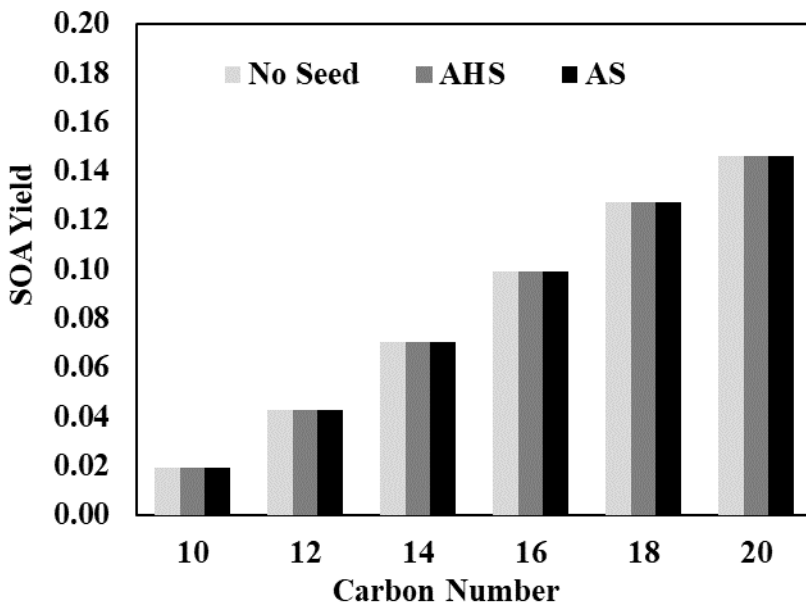

**Figure S5.** Simulated SOA yields for a series of linear alkanes under three different seed conditions: no seed, 10  $\mu\text{g}/\text{m}^3$  ammonium hydrogen sulfate (AHS), and 10  $\mu\text{g}/\text{m}^3$  ammonium sulfate (AS). VOC ppbC / $NO_x$  ppb = 3, RH = 60% and  $OM_0 = 5 \mu\text{g}/\text{m}^3$ .

## Section S9. Uncertainty due to autoxidation rate constant

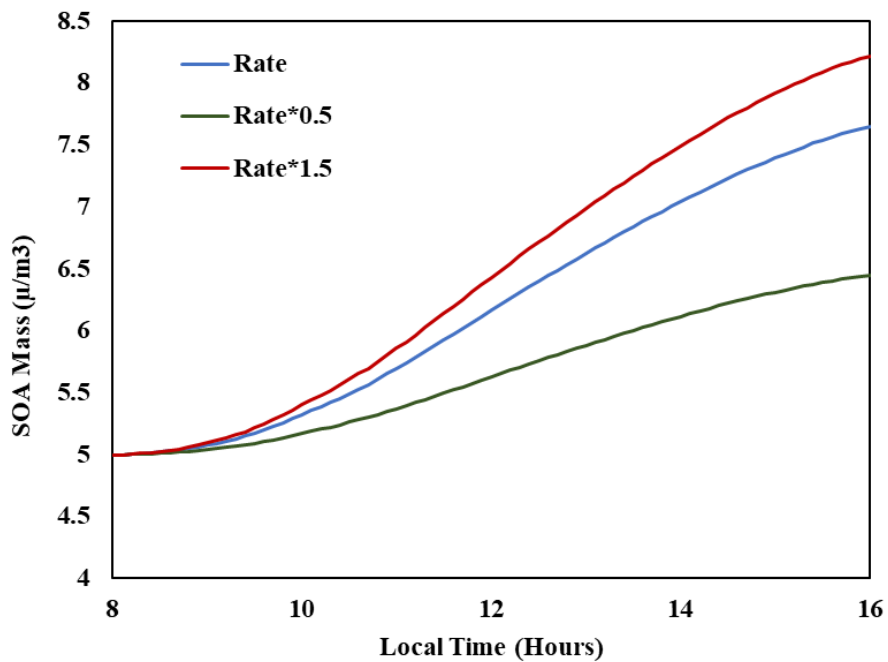

**Figure S6.** The impact of changing the primary rate constant responsible for the formation of autoxidation SOA mass in the C12 gas oxidation mechanism (SR1), by factors of 0.5 and 1.5, on C12 SOA formation. VOC ppbC /NO<sub>x</sub> ppb = 3, RH = 30%, OM<sub>0</sub> = 5 µg/m<sup>3</sup>, and C12 consumed = 100 µg/m<sup>3</sup>.

## Section S10. C12 autoxidation mechanism reactions and rate constants

**Table S5.** C12 Autoxidation reaction mechanism and rate constants

| Label                                                    | Reaction                                                                                                      | Rate Constant<br>( $\text{cm}^3 \text{ molecule}^{-1} \text{ s}^{-1}$ ) |
|----------------------------------------------------------|---------------------------------------------------------------------------------------------------------------|-------------------------------------------------------------------------|
| H-Shift Reactions <sup>a</sup>                           |                                                                                                               |                                                                         |
| SR1                                                      | $\text{HO3C126O2} = \text{C123OH6OOH3O2}$                                                                     | $0.8\text{E}17*\text{EXP}(-1.2077\text{E}4/\text{TEMP}) ;$              |
| SR2                                                      | $\text{C125O2} = \text{C124OOH356CO2O2}$                                                                      | $1.2\text{E}18*\text{EXP}(-1.2077\text{E}4/\text{TEMP}) ;$              |
| SR3                                                      | $\text{C123OH6OOH3O2} = \text{C123OH6CO3OOH} + \text{OH}$                                                     | $1.2\text{E}17*\text{EXP}(-1.2077\text{E}4/\text{TEMP}) ;$              |
| SR4                                                      | $\text{C125OH3CO2OOH4O2} = \text{C1223CO5OH4OOH} + \text{OH}$                                                 | $1.2\text{E}17*\text{EXP}(-1.2077\text{E}4/\text{TEMP}) ;$              |
| SR5                                                      | $\text{NONO} = \text{C93OH6OOH3O2}$                                                                           | $1.2\text{E}18*\text{EXP}(-1.2077\text{E}4/\text{TEMP}) ;$              |
| SR6                                                      | $\text{C124OOH356CO2O2} = \text{C123456CO2OOH} + \text{OH}$                                                   | $1.2\text{E}18*\text{EXP}(-1.2077\text{E}4/\text{TEMP});$               |
| SR7                                                      | $\text{C125OH3CO2OOH5O2} = \text{C125OH23CO5OOH} + \text{OH}$                                                 | $1.2\text{E}18*\text{EXP}(-1.2077\text{E}4/\text{TEMP}) ;$              |
| SR8                                                      | $\text{C93OH6OOH3O2} = \text{OH} + \text{C93OH6CO3OOH}$                                                       | $1.2\text{E}18*\text{EXP}(-1.2077\text{E}4/\text{TEMP});$               |
| SR9                                                      | $\text{C122O2} = \text{C125OH3CO2OOH4O2}$                                                                     | $1.2\text{E}16*\text{EXP}(-1.2077\text{E}4/\text{TEMP}) ;$              |
| SR10                                                     | $\text{C122O2} = \text{C125OH3CO2OOH5O2}$                                                                     | $1.2\text{E}16*\text{EXP}(-1.2077\text{E}4/\text{TEMP}) ;$              |
| RO2 Autoxidation Reactions with RO2 Species <sup>a</sup> |                                                                                                               |                                                                         |
| SR11                                                     | $\text{C12356CO4OOH2O2} = \text{C122OH356CO4OOH}$                                                             | $8.8\text{E}-13*0.2*\text{RO2};$                                        |
| SR12                                                     | $\text{C12356CO4OOH2O2} = \text{C122356CO4OOH}$                                                               | $8.8\text{E}-13*0.2*\text{RO2};$                                        |
| SR13                                                     | $\text{C12356CO4OOH2O2} = \text{C12356CO4OOH2O}$                                                              | $8.8\text{E}-13*0.6*\text{RO2};$                                        |
| SR14                                                     | $\text{C123OH6OOH3O2} = \text{C123OH36OOH}$                                                                   | $8.8\text{E}-13*0.5*\text{RO2} ;$                                       |
| SR15                                                     | $\text{C123OH6OOH3O2} = \text{C123OH6OOH3O}$                                                                  | $8.8\text{E}-13*0.5*\text{RO2} ;$                                       |
| SR16                                                     | $\text{C125OH3CO2OOH5O2} = \text{C1255OH3CO2OOH}$                                                             | $8.8\text{E}-13*0.5*\text{RO2} ;$                                       |
| SR17                                                     | $\text{C125OH3CO2OOH5O2} = \text{C122OOH3CO5OH5O}$                                                            | $8.8\text{E}-13*0.5*\text{RO2} ;$                                       |
| SR18                                                     | $\text{C125OH3CO2OOH4O2} = \text{C1245OH3CO2OOH}$                                                             | $8.8\text{E}-13*0.2*\text{RO2} ;$                                       |
| SR19                                                     | $\text{C125OH3CO2OOH4O2} = \text{C125OH34CO2OOH}$                                                             | $8.8\text{E}-13*0.2*\text{RO2} ;$                                       |
| SR20                                                     | $\text{C125OH3CO2OOH4O2} = \text{C125OH3CO2OOH4O}$                                                            | $8.8\text{E}-13*0.6*\text{RO2} ;$                                       |
| RO2 + HO2 Reactions <sup>b</sup>                         |                                                                                                               |                                                                         |
| SR21                                                     | $\text{C124OOH356CO2O2} + \text{HO2} = \text{C12356CO24OOH}$                                                  | $\text{KRO2HO2};$                                                       |
| SR22                                                     | $\text{C123OH6OOH3O2} + \text{HO2} = \text{C123OH36OOH}$                                                      | $\text{KRO2HO2} ;$                                                      |
| SR23                                                     | $\text{C125OH3CO2OOH4O2} + \text{HO2} = \text{C125OH3CO24OOH}$                                                | $\text{KRO2HO2} ;$                                                      |
| SR24                                                     | $\text{C125OH3CO2OOH5O2} + \text{HO2} = \text{C1255OH3CO2OOH4O}$                                              | $\text{KRO2HO2} ;$                                                      |
| SR25                                                     | $\text{HO3C96O2} + \text{HO2} = \text{C93CO6OOH}$                                                             | $\text{KRO2HO2} ;$                                                      |
| SR26                                                     | $\text{C9356CO4OOH2O2} + \text{HO2} = \text{C9356CO24OOH}$                                                    | $\text{KRO2HO2} ;$                                                      |
| Photolysis Reactions <sup>b</sup>                        |                                                                                                               |                                                                         |
| SR27                                                     | $\text{C923CO1CHO} = \text{CO} + \text{CO} + \text{HO2} + \text{C6H13CO3}$                                    | $\text{J}(34) ;$                                                        |
| SR28                                                     | $\text{C923CO1CHO} = \text{HCOCO} + \text{C5H13CO3}$                                                          | $\text{J}(35) ;$                                                        |
| SR29                                                     | $\text{C1223CO5OH4OOH} = \text{C1223CO5OH4O} + \text{OH}$                                                     | $\text{J}(41) ;$                                                        |
| SR30                                                     | $\text{C43CO2OOH4CHO} = \text{C412CO3O} + \text{OH}$                                                          | $\text{J}(41) ;$                                                        |
| SR31                                                     | $\text{C623CO1CHO} = \text{C3H7CO3} + \text{CO} + \text{CO} + \text{HO2}$                                     | $\text{J}(34) ;$                                                        |
| SR32                                                     | $\text{C623CO1CHO} = \text{C3H7CO3} + \text{HCOCO}$                                                           | $\text{J}(35) ;$                                                        |
| RO2 + NO Reactions <sup>c</sup>                          |                                                                                                               |                                                                         |
| SR33                                                     | $\text{C124OOH356CO2O2} + \text{NO} = \text{C923CO1CHO} + \text{NO2} + \text{CH3CHO} + \text{CO} + \text{OH}$ | $\text{KRO2NO};$                                                        |

|                                    |                                                  |                             |
|------------------------------------|--------------------------------------------------|-----------------------------|
| SR34                               | $C123OH6OOH3O2 + NO = C123OH6OOH3NO3$            | $KRO2NO^{*0.5};$            |
| SR35                               | $C123OH6OOH3O2 + NO = C123OH6OOH3O + NO2$        | $KRO2NO^{*0.5};$            |
| SR36                               | $C125OH3CO2OOH4O2 + NO = C125OH3CO2OOH4O + NO2$  | $KRO2NO ;$                  |
| SR37                               | $C125OH3CO2OOH5O2 + NO = C125OH3CO2OOH5NO3$      | $KRO2NO^{*0.5};$            |
| SR38                               | $C125OH3CO2OOH5O2 + NO = C125OH3CO2OOH5O + NO2$  | $KRO2NO^{*0.5};$            |
| SR39                               | $C9356CO4OOH2O2 + NO = C9356CO4OOH2O + NO2$      | $KRO2NO;$                   |
| Split Reactions I <sup>b</sup>     |                                                  |                             |
| SR40                               | $C123OH6OOH3O = C104OOHCO2H + C2H5O2$            | $2.00E14*EXP(-4714/TEMP);$  |
| SR41                               | $C125OH3CO2OOH4O = C7H15CHO + C43CO2OOH4CHO$     | $2.00E14*EXP(-4714/TEMP);$  |
| SR42                               | $C125OH3CO2OOH5O = C7H15CO2H + MEKCO2$           | $2.00E14*EXP(-4714/TEMP) ;$ |
| NO3 radical Reactions <sup>b</sup> |                                                  |                             |
| SR43                               | $C923CO1CHO + NO3 = C6H13CO3 + CO + CO + HNO3$   | $KNO3AL^{*4.0};$            |
| SR44                               | $C623CO1CHO + NO3 = C3H7CO3 + CO + CO + HNO3$    | $KNO3AL^{*4.0} ;$           |
| Split Reactions II <sup>b</sup>    |                                                  |                             |
| SR45                               | $C412CO3O = HCOCO + CH3CHO$                      | $KDEC ;$                    |
| SR46                               | $C12356CO4OOH2O = CH3CHO + CO + OH + C923CO1CHO$ | $KDEC;$                     |
| SR47                               | $C1223CO5OH4O = C92OH1CHO + CH3CO3 + OH$         | $KDEC ;$                    |
| SR48                               | $C9356CO4OOH2O = CH3CHO + CO + OH + C623CO1CHO$  | $KDEC ;$                    |
| SR49                               | $C623CO1CHO + OH = C3H7CO3 + CO + CO + H2O$      | $1.23E-11 ;$                |
| SR50                               | $C923CO1CHO + OH = C6H13CO3 + CO + CO$           | $1.23E-11;$                 |
| Dimerization <sup>a</sup>          |                                                  |                             |
| SR51                               | $C123OH6OOH3O2 = DIC123OH6OOH3OOR$               | $1E-13*RO2 ;$               |
| SR52                               | $C125OH3CO2OOH5O2 = DIC125OH3CO2OOH5OOR$         | $1E-13*RO2 ;$               |
| SR53                               | $C125OH3CO2OOH4O2 = DIC1234CO2OOH4OOR$           | $1E-13*RO2 ;$               |

<sup>a</sup>Rate constants are similar to those used by Roldin et al. (2019) <sup>b</sup>Rate constants used are same as rate constants for similar reactions found in MCMv3.3.1(Jenkin et al., 2012) <sup>c</sup>Rate constant (KRO2NO) is the same as that used for similar reactions in MCMv3.3.1. When 2 different sets of products were possible for same reactants, branching was assumed to be 50%/50%.

Compounds in Table S4 added within the autoxidation mechanism are named as follows:

- When a compound found in MCMv3.3.1 is used, the name is left the same
- Each compound begins with the carbon number (i.e. C12 means a 12 carbon frame)
- Functional groups are defined by the carbon that they are attached to followed by the group (i.e. 34OH represents an OH group attached to the 3<sup>rd</sup> carbon and one attached to the 4<sup>th</sup> carbon). The order of the functional groups are as follows
  - OH
  - CO
  - OOH
  - O2, O, NO3, CO2H, CHO
    - These functional groups are last. No conflict occurs as at most only 1 of these function are present on each compound
- Compounds that begin with "DI" are dimer compounds

## References

Abraham, M. H. and McGowan, J. C.: The Use of Characteristic Volumes to Measure Cavity Terms in Reversed Phase Liquid Chromatography, *Chromatographia*, 23, 243-246, 1987.

Abraham, M. H., Whiting, G. S., Doherty, R. M., and Shuely, W. J.: Hydrogen bonding: XVI. A new solute solvation parameter,  $\pi_2H$ , from gas chromatographic data, *Journal of Chromatography A*, 587, 213-228, [https://doi.org/10.1016/0021-9673\(91\)85158-C](https://doi.org/10.1016/0021-9673(91)85158-C), 1991.

Jenkin, M. E., Wyche, K. P., Evans, C. J., Carr, T., Monks, P. S., Alfarra, M. R., Barley, M. H., McFiggans, G. B., Young, J. C., and Rickard, A. R.: Development and chamber evaluation of the MCM v3.2 degradation scheme for  $\beta$ -caryophyllene, *Atmos. Chem. Phys.*, 12, 5275-5308, 10.5194/acp-12-5275-2012, 2012.

Kwok, E. S. C. and Atkinson, R.: Estimation of hydroxyl radical reaction rate constants for gas-phase organic compounds using a structure-reactivity relationship: An update, *Atmospheric Environment*, 29, 1685-1695, [https://doi.org/10.1016/1352-2310\(95\)00069-B](https://doi.org/10.1016/1352-2310(95)00069-B), 1995.

Leahy, D. E., Morris, J. J., Taylor, P. J., and Wait, A. R.: Model solvent systems for QSAR. Part 3. An LSER analysis of the 'critical quartet.' New light on hydrogen bond strength and directionality, *Journal of the Chemical Society, Perkin Transactions 2*, 705-722, 10.1039/p29920000705, 1992.

Platts, J. A., Butina, D., Abraham, M. H., and Hersey, A.: Estimation of Molecular Linear Free Energy Relation Descriptors Using a Group Contribution Approach, *Journal of Chemical Information and Computer Sciences*, 39, 835-845, 10.1021/ci980339t, 1999.

Puzyn, T., Leszczynski, J., and Cronin, M. T.: Recent advances in QSAR studies: methods and applications, 2010.
